# Supplementary material
Source: PubMed Central journal article supplement (PMC5135274)
Supplement: jciinsight-1-87446-s001.pdf [file jciinsight-1-87446-s001.pdf]

## **Supplemental Data**

### **Pentraxin-2 suppresses c-Jun/AP-1 signaling to inhibit progressive fibrotic disease**

Naoki Nakagawa<sup>1,2,3†</sup>, Luke Barron<sup>4†</sup>, Ivan G. Gomez<sup>1,2,4</sup>, Bryce G. Johnson<sup>1,2,4</sup>, Allie M. Roach<sup>1,2,4</sup>, Sei Kameoka<sup>4</sup>, Richard M. Jack<sup>5</sup>, Mark L. Lupper, Jr.<sup>5</sup>, Sina A. Gharib<sup>2,6,7</sup>, and Jeremy S. Duffield<sup>1,2,4\*</sup>

1. Supplemental Figures
2. Supplemental Tables

# Figure S1

## M1

## M2

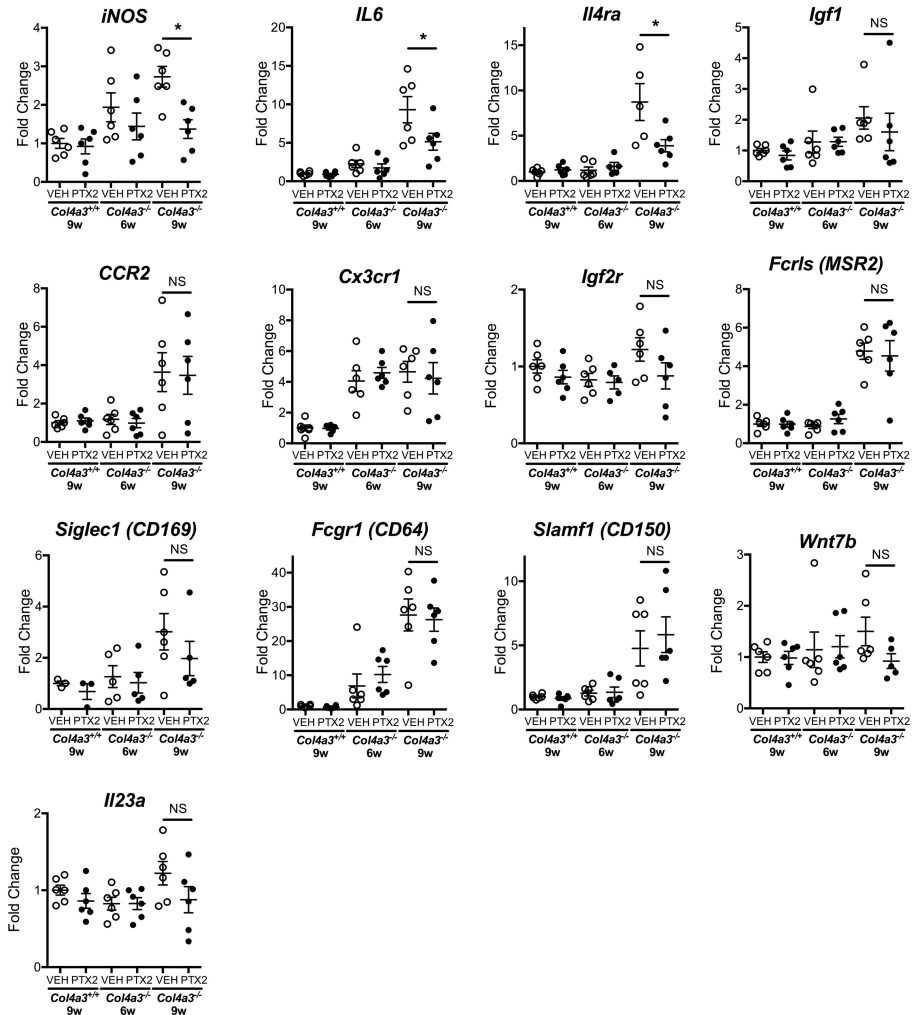

**Supplemental Figure 1. rhPTX-2 decreases some M1-type but not M2-type markers of macrophage activation.**

Q-PCR analysis of markers associated with M1-type or M2-type macrophage activation in whole kidney tissue at 9wk. N = 6-12/group. \* P < 0.05; NS, not significant (ANOVA with post hoc testing for multiple comparisons, or Mann-Whitney test).

Downregulated by disease

Upregulated by disease

Col4a3+/+ Col4a3-/-

Col4a3+/+ Col4a3-/-

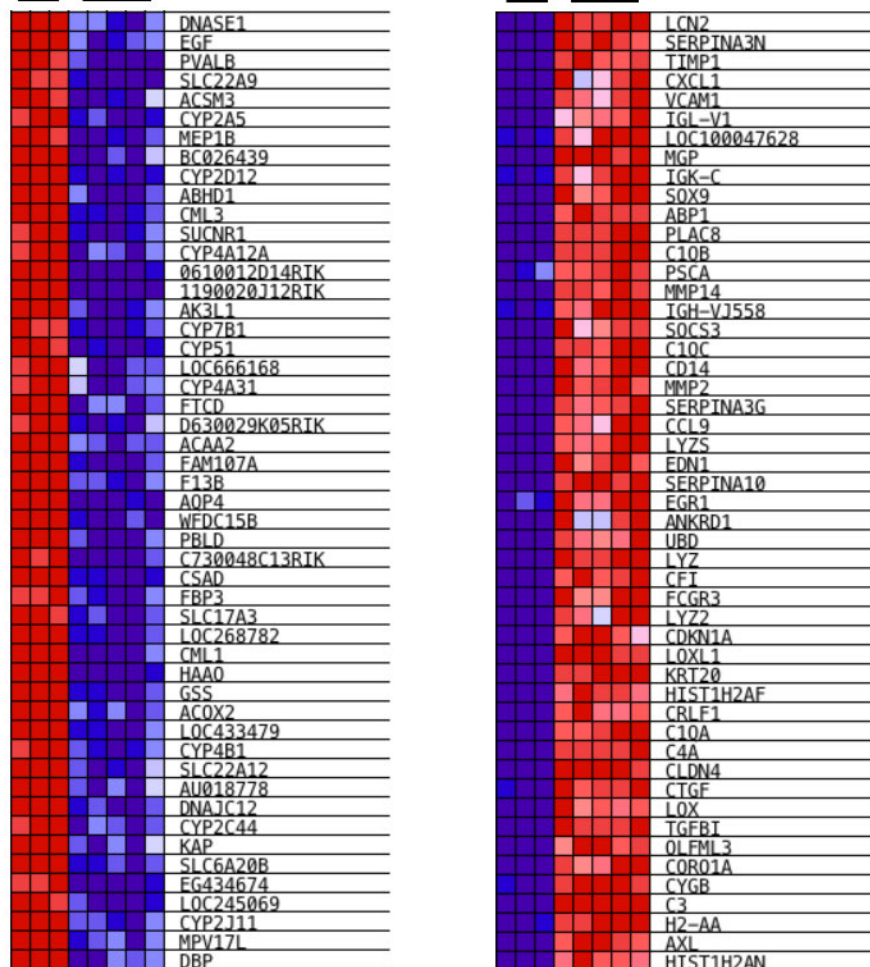

**Supplemental Figure 2. The most differentially expressed kidney genes in healthy controls versus Alport nephropathy.** Heat map of the top 50 upregulated and downregulated kidney genes in Alport neuropathy comparing healthy WT control (N = 3) to Col4a3-/- (N = 5) mice at 9wk by RNA microarray. Higher (red) and lower (blue) expression of individual mice relative to mean WT levels are shown.

Upregulated by rhPTX2

Downregulated by rhPTX2

veh rhPTX2

veh rhPTX2

Col4a3-/-

Col4a3-/-

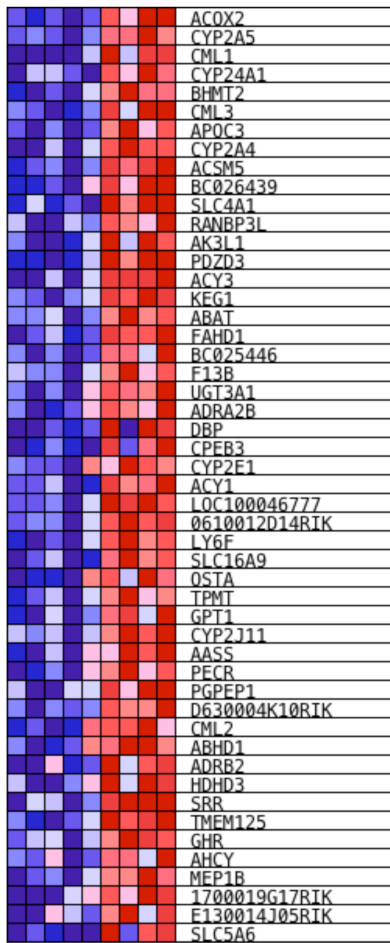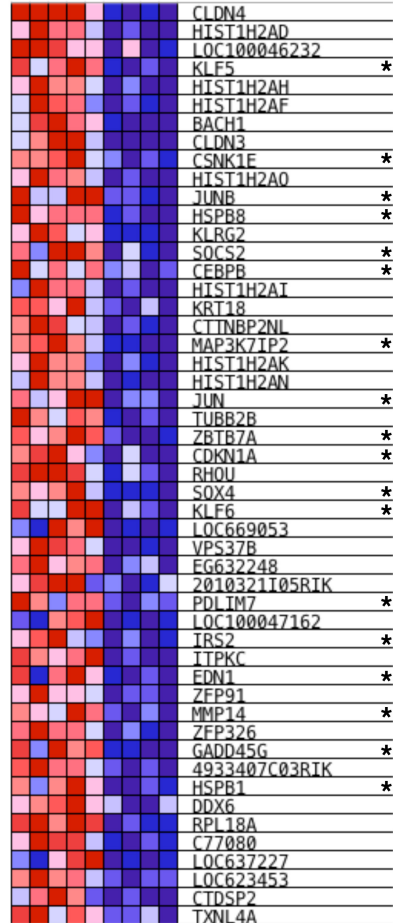

**Supplemental Figure 3. The most differentially expressed kidney genes in untreated Alport neuropathy versus rhPTX-2 treatment.** Heat map of the top 50 upregulated and downregulated kidney genes with rhPTX-2 treatment of Alport neuropathy comparing vehicle control (N = 5) to rhPTX-2 treated (N = 4) Col4a3<sup>-/-</sup> mice at 9wk by RNA microarray. Higher (red) and lower (blue) expression of individual mice relative to mean WT levels are shown. Asterisks indicate downregulated genes predicted to interact with one another by STRING analysis (Figure 6C).

# Figure S4

## Network objects

| Rank | Pathway map                                                                      | Network objects |      |       |          |       |       |
|------|----------------------------------------------------------------------------------|-----------------|------|-------|----------|-------|-------|
|      |                                                                                  | c-Jun and AP-1  | MAPK | NF-κB | JAK/STAT | TRAF6 | MyD88 |
| 1    | Cytoskeleton remodeling_TGF, WNT and cytoskeletal remodeling                     |                 |      |       |          |       |       |
| 2    | Immune response_HSP60 and HSP70/ TLR signaling pathway                           |                 |      |       |          |       |       |
| 3    | Immune response_MIF in innate immunity response                                  |                 |      |       |          |       |       |
| 4    | Transcription_P53 signaling pathway                                              |                 |      |       |          |       |       |
| 5    | Immune response_IL-1 signaling pathway                                           |                 |      |       |          |       |       |
| 6    | Cell adhesion_Chemokines and adhesion                                            |                 |      |       |          |       |       |
| 7    | Development_Regulation of epithelial-to-mesenchymal transition (EMT)             |                 |      |       |          |       |       |
| 8    | Immune response_Bacterial infections in normal airways                           |                 |      |       |          |       |       |
| 9    | Development_Thrombopoietin signaling via JAK-STAT pathway                        |                 |      |       |          |       |       |
| 10   | Immune response_IL-18 signaling                                                  |                 |      |       |          |       |       |
| 11   | Development_WNT signaling pathway. Part 2                                        |                 |      |       |          |       |       |
| 12   | Immune response_Oncostatin M signaling via JAK-Stat in mouse cells               |                 |      |       |          |       |       |
| 13   | Signal transduction_PTMs in IL-17-induced CIKS-dependent MAPK signaling pathways |                 |      |       |          |       |       |
| 14   | Immune response_TLR2 and TLR4 signaling pathways                                 |                 |      |       |          |       |       |
| 15   | Development_PEDF signaling                                                       |                 |      |       |          |       |       |
| 16   | Development_NOTCH1-mediated pathway for NF-κB activity modulation                |                 |      |       |          |       |       |
| 17   | Immune response_Oncostatin M signaling via JAK-Stat in human cells               |                 |      |       |          |       |       |
| 18   | IGF family signaling in colorectal cancer                                        |                 |      |       |          |       |       |
| 19   | IL-6 signaling in multiple myeloma                                               |                 |      |       |          |       |       |
| 20   | Signal transduction_AKT signaling                                                |                 |      |       |          |       |       |

 Present in pathway map  
 Absent from map

**Supplemental Figure 4. Gene pathway enrichment analysis of genes downregulated by rhPTX-2 widely involves AP-1, MAPK, and NF-κB components.** Genes downregulated by rhPTX-2 treatment versus vehicle control were uploaded to the GeneGo knowledge base and analyzed for pathway enrichment. The top 20 affected pathways were ranked and scored for including key signaling components as network objects.

# Figure S5

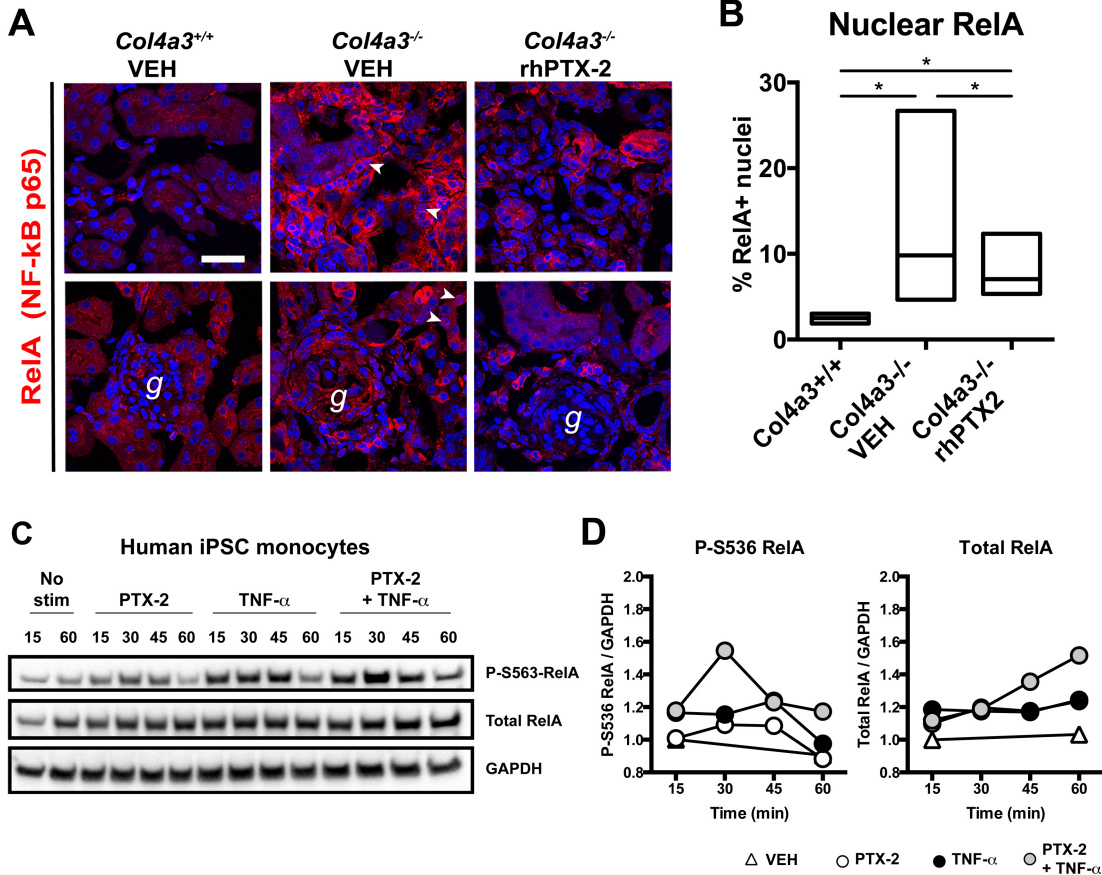

**Supplemental Figure 5. Col4a3<sup>-/-</sup> kidneys show overall decreased RelA activation in response to rhPTX-2 but rhPTX-2 does not suppress active RelA in human monocytes in vitro.**

(A) Representative images of kidney tissue sections from 9wk Col4a3<sup>+/+</sup> and vehicle or rhPTX-2 treated Col4a3<sup>-/-</sup> mice showing RelA (NF-κB p65) intensity and localization. Examples of RelA co-localized with nuclear staining (DAPI, blue) indicated by arrowheads. g = glomerulus. (B) Box plots (Maximum, median, and minimum percentages) showing % cells in kidney sections with nuclear localization of RelA. ~1300 nuclei across 10 kidney cortex section images from each mouse were scored. Note nuclear RelA increases with disease and is inhibited by rhPTX-2 in vivo. (C-D) Time course western blots of RelA phosphorylation and total RelA from 15-60 min after rhPTX-2 and/or TNF-α stimulation in iPSC-derived monocytes, normalized to GAPDH. Note PTX-2 does not directly suppress active RelA in monocytes. Bar = 50μm. N = 3-5/group. \* P < 0.05 by one-tailed Mann-Whitney test.

**Figure S6**

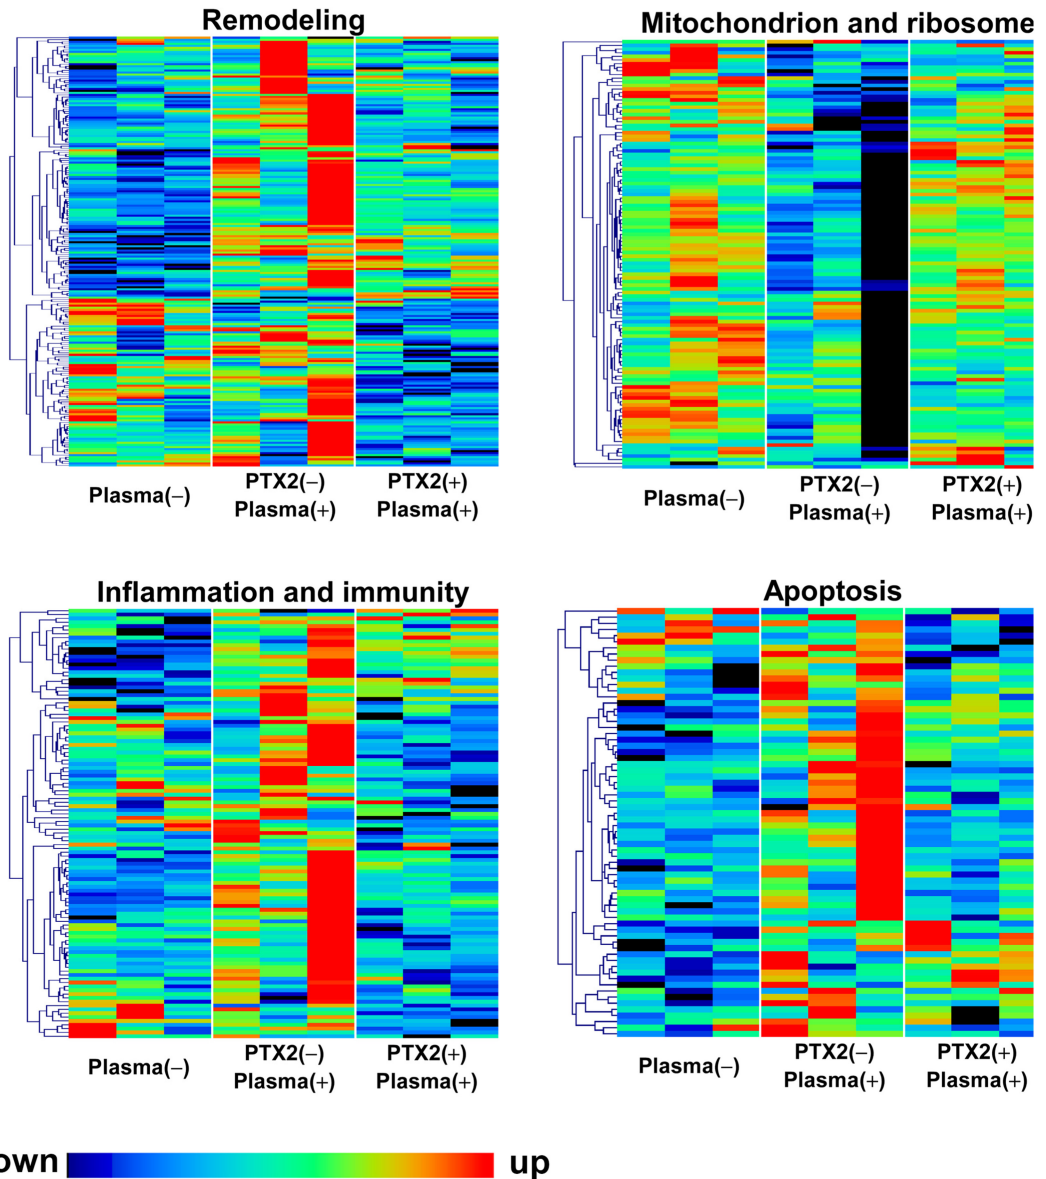

**Supplemental Figure 6. Human primary proximal kidney tubule epithelial cells resist the effects of plasma shock across major pathways after rhPTX-2 treatment.** Human PTECs were cultured 24hr with no treatment, human plasma, or rhPTX-2 treatment for 1hr followed by plasma. Gene expression profiles were determined by microarray and analyzed by GSEA. Plasma shock primarily activated pathways for tissue remodeling, inflammation and immunity, and apoptosis while suppressing mitochondrion and ribosome functions. rhPTX-2 treatment reduced the response to plasma in each of these broad categories. Enriched gene sets are depicted as heat maps of individual leading edge genes (rows) and replicate cultures (columns) (N = 3/group from 3 different donors).

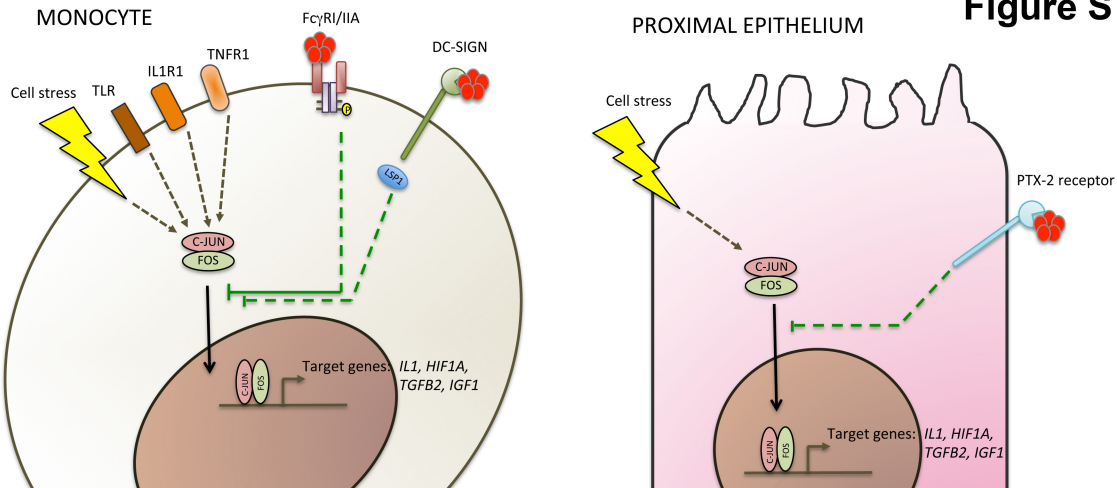

**Supplemental Figure 7. Schema showing the effect of PTX-2 on inflammatory or stress pathway signaling in monocytes and proximal tubule epithelial cells.** PTX-2 can bind to activating Fc $\gamma$ R or DC-SIGN on monocytes. It triggers partial phosphorylation of Fc $\gamma$ R chain. Such partial receptor activation imparts an inhibitory signal, which counteracts activating signals from other receptors including TNF receptor 1. The inhibitory effect is predominantly by blocking AP-1 complex translocation to the nucleus and activation of AP1-dependent genes. In epithelium, evidence suggests an unknown receptor can interact with PTX-2 to transduce an inhibitory signal which similarly reduces AP-1 signaling in response to cell stress or cytokines such as TGF $\beta$ .



**Table S1: Top GSEA pathways activated in kidney by Alport nephropathy**

| <b>Rank</b> | <b>Upregulated gene set in Col4a3<sup>-/-</sup> versus control mice at 9wk</b> |
|-------------|--------------------------------------------------------------------------------|
| 1           | DEFENSE_RESPONSE                                                               |
| 2           | IMMUNE_SYSTEM_PROCESS                                                          |
| 3           | CELL_ACTIVATION                                                                |
| 4           | PROTEINACEOUS_EXTRACELLULAR_MATRIX                                             |
| 5           | EXTRACELLULAR_REGION_PART                                                      |
| 6           | EXTRACELLULAR_MATRIX                                                           |
| 7           | KEGG_ECM_RECEPTOR_INTERACTION                                                  |
| 8           | PID_INTEGRIN1_PATHWAY                                                          |
| 9           | KEGG_CHEMOKINE_SIGNALING_PATHWAY                                               |
| 10          | REACTOME_INTERFERON_GAMMA_SIGNALING                                            |
| 11          | REACTOME_INTERFERON_SIGNALING                                                  |
| 12          | KEGG_PATHOGENIC_ESCHERICHIA_COLI_INFECTION                                     |
| 13          | PID_IL6_7PATHWAY                                                               |
| 14          | REACTOME_CYTOKINE_SIGNALING_IN_IMMUNE_SYSTEM                                   |
| 15          | REACTOME_INTEGRIN_CELL_SURFACE_INTERACTIONS                                    |
| 16          | REACTOME_INTERFERON_ALPHA_BETA_SIGNALING                                       |
| 17          | KEGG_B_CELL_RECEPTOR_SIGNALING_PATHWAY                                         |
| 18          | KEGG_LEISHMANIA_INFECTION                                                      |
| 19          | PID_IL23_PATHWAY                                                               |
| 20          | PID_TCR_PATHWAY                                                                |
| 21          | PID_PDGFRA_PATHWAY                                                             |
| 22          | KEGG_FC_GAMMA_R_MEDIATED_PHAGOCYTOSIS                                          |
| 23          | REACTOME_EXTRACELLULAR_MATRIX_ORGANIZATION                                     |
| 24          | EXTRACELLULAR_MATRIX_STRUCTURAL_CONSTITUENT                                    |
| 25          | PID_INTEGRIN3_PATHWAY                                                          |

**Table S2: Top genes identified by leading edge analysis of GSEA**

| <b>Gene name</b> | <b>Enrichment Score</b> |
|------------------|-------------------------|
| CLDN4            | 1.49058                 |
| HIST1H2AD        | 1.32975                 |
| LOC100046232     | 1.26426                 |
| KLF5             | 1.26420                 |
| HIST1H2AH        | 1.20503                 |
| HIST1H2AF        | 1.19361                 |
| BACH1            | 1.18299                 |
| CLDN3            | 1.17773                 |
| CSNK1E           | 1.17255                 |
| HIST1H2AO        | 1.15799                 |
| JUNB             | 1.15649                 |
| HSPB8            | 1.15450                 |
| KLRG2            | 1.15306                 |
| SOCS2            | 1.13105                 |
| CEBPB            | 1.12654                 |
| HIST1H2AI        | 1.11656                 |
| KRT18            | 1.10294                 |
| CTTNBP2NL        | 1.09788                 |
| MAP3K7IP2        | 1.09747                 |
| HIST1H2AK        | 1.08938                 |
| HIST1H2AN        | 1.08856                 |
| JUN              | 1.08497                 |
| TUBB2B           | 1.08370                 |
| ZBTB7A           | 1.08127                 |
| CDKN1A           | 1.07322                 |
| RHOA             | 1.06619                 |
| SOX4             | 1.06390                 |
| KLF6             | 1.01302                 |
| LOC669053        | 1.00752                 |
| VPS37B           | 1.00402                 |
| EG632248         | 0.99455                 |
| 2010321I05RIK    | 0.97755                 |
| PDLIM7           | 0.97753                 |
| LOC100047162     | 0.96719                 |
| IRS2             | 0.96220                 |
| ITPKC            | 0.95866                 |
| EDN1             | 0.95767                 |
| ZFP91            | 0.95502                 |
| MMP14            | 0.94396                 |
| ZFP326           | 0.94312                 |

|               |         |
|---------------|---------|
| GADD45G       | 0.92965 |
| 4933407C03RIK | 0.92220 |
| HSPB1         | 0.91852 |
| DDX6          | 0.91571 |
| RPL18A        | 0.90159 |
| C77080        | 0.89511 |
| LOC637227     | 0.89290 |
| LOC623453     | 0.88459 |
| CTDSP2        | 0.88432 |
| TXNL4A        | 0.87974 |
| 2410006H16RIK | 0.87189 |
| PHF13         | 0.86722 |
| SLC10A6       | 0.86533 |
| SPPL3         | 0.86155 |
| IGH-4         | 0.85895 |
| NGFRAP1       | 0.85412 |
| ANKRD11       | 0.85267 |
| ASXL1         | 0.85176 |
| SMOX          | 0.84992 |
| BCL2L11       | 0.84895 |
| PRR8          | 0.84841 |
| 6720427H10RIK | 0.84524 |
| SUPT5H        | 0.84364 |
| SLPI          | 0.84194 |
| GADD45A       | 0.84191 |
| IGF2BP2       | 0.84113 |
| AXUD1         | 0.83853 |
| NFKBIA        | 0.83677 |
| 5530400B01RIK | 0.83584 |
| SERPINB6A     | 0.83500 |
| 5730494J16RIK | 0.83341 |
| FOSL2         | 0.82916 |
| CREBBP        | 0.82661 |
| IFNGR1        | 0.82481 |
| NIPBL         | 0.82376 |
| RAB11FIP5     | 0.81662 |
| CHKA          | 0.81576 |
| CHD1          | 0.81396 |
| D2ERTD391E    | 0.81360 |
| MAP3K3        | 0.81193 |
| BMP1          | 0.81149 |
| AXIN1         | 0.80972 |
| LOC676222     | 0.80918 |

|                  |         |
|------------------|---------|
| LOC100047093     | 0.80734 |
| CHD2             | 0.80718 |
| SESN2            | 0.80634 |
| PLP2             | 0.80571 |
| SULF1            | 0.80546 |
| SERPINE2         | 0.80371 |
| ERDR1            | 0.80031 |
| SCL0001118.1_0   | 0.80028 |
| SAMD4B           | 0.79537 |
| STAT3            | 0.79405 |
| YBX3             | 0.79306 |
| RELL1            | 0.79151 |
| RASL11A          | 0.79114 |
| BBC3             | 0.78901 |
| ACSL1            | 0.78898 |
| BC003236         | 0.78875 |
| CRLF1            | 0.78437 |
| EG626367         | 0.78329 |
| DDX3Y            | 0.78185 |
| FZD5             | 0.78081 |
| IGHG1_J00453\$VC | 0.77963 |
| SYF2             | 0.77799 |
| ORMDL3           | 0.77488 |
| NCAPH2           | 0.77445 |
| NUAK1            | 0.77408 |
| RPL18            | 0.77368 |
| ITGB4            | 0.77322 |
| PI16             | 0.77222 |
| ZFP664           | 0.76939 |
| DUSP8            | 0.76938 |
| EG237361         | 0.76853 |
| RNF4             | 0.76822 |
| SPHK1            | 0.76714 |
| GSK3B            | 0.76676 |
| GLIPR2           | 0.76576 |
| KCTD10           | 0.76241 |
| PABPN1           | 0.76104 |
| LOC381283        | 0.76057 |
| HOXD9            | 0.75761 |
| SOCS3            | 0.75663 |
| TNIP1            | 0.75516 |
| IGK-C            | 0.75063 |
| COL15A1          | 0.75035 |

|                  |         |
|------------------|---------|
| IGLC2_J00595_IG_ | 0.74959 |
| PNPLA2           | 0.74878 |
| MAF1             | 0.74778 |
| RGS16            | 0.74734 |
| MFAP5            | 0.74588 |
| EG382843         | 0.74486 |
| ARNTL            | 0.74328 |
| WDR45L           | 0.74310 |
| A530089A20RIK    | 0.74143 |
| CSNK1D           | 0.73900 |
| SYNE2            | 0.73737 |
| SERINC2          | 0.73621 |
| LOC626152        | 0.73601 |
| TBC1D17          | 0.73489 |
| PEG3             | 0.73458 |
| 4921506J03RIK    | 0.73419 |
| RORA             | 0.73413 |
| GATS             | 0.73066 |
| LOC100046483     | 0.72971 |
| KLF7             | 0.72937 |
| CCDC120          | 0.72818 |
| 1810008K04RIK    | 0.72663 |
| LOC100047628     | 0.72566 |
| AI450540         | 0.72377 |
| LOC100047260     | 0.72165 |
| CTSF             | 0.72060 |
| RBM35A           | 0.72057 |
| ARRDC4           | 0.72052 |
| ADAMTS2          | 0.71923 |
| MIDN             | 0.71875 |
| ZFAND2A          | 0.71817 |
| MYD116           | 0.71816 |
| GM1673           | 0.71723 |
| LOC676136        | 0.71715 |
| 1110038B12RIK    | 0.71537 |
| CTSL             | 0.71528 |
| COL7A1           | 0.71504 |
| MMP2             | 0.71497 |
| GSTO1            | 0.71482 |
| HIST2H2AC        | 0.71276 |
| STK11            | 0.71190 |
| WIPI1            | 0.71106 |
| 1700023B02RIK    | 0.71018 |

|               |         |
|---------------|---------|
| CCDC80        | 0.70989 |
| KLF13         | 0.70949 |
| RNPS1         | 0.70922 |
| GADD45B       | 0.70721 |
| ETS2          | 0.70701 |
| DNAJB6        | 0.70671 |
| ACTB          | 0.70548 |
| IER3          | 0.70439 |
| E030010A14RIK | 0.70365 |
| NEURL         | 0.70250 |
| ARHGEF5       | 0.70114 |
| CHK           | 0.70112 |
| LBP           | 0.69975 |
| BCAM          | 0.69837 |
| IGH-VJ558     | 0.69765 |
| CD14          | 0.69739 |
| ERCC2         | 0.69720 |
| ZYX           | 0.69336 |
| 1100001F19RIK | 0.69069 |
| EG667728      | 0.68875 |
| ULK1          | 0.68852 |
| E430002G05RIK | 0.68810 |
| LRFN3         | 0.68780 |
| IFNGR2        | 0.68656 |
| COL4A2        | 0.68602 |
| IBRDC3        | 0.68400 |
| CBR3          | 0.68326 |
| VDR           | 0.68252 |
| GCAP27        | 0.68190 |
| RBMS1         | 0.68148 |
| CD163         | 0.68148 |
| FBLN2         | 0.68060 |
| SOX9          | 0.67859 |
| PIGT          | 0.67731 |
| LOC381140     | 0.67695 |
| CAPG          | 0.67589 |
| CISH          | 0.67560 |
| LOC381448     | 0.67476 |
| HIST2H3C1     | 0.67398 |
| PTPRS         | 0.67392 |
| B4GALT3       | 0.67240 |
| E330018D03RIK | 0.67205 |
| B430201A12RIK | 0.67104 |

|                  |         |
|------------------|---------|
| BC030476         | 0.67022 |
| ZFP212           | 0.66760 |
| POLR1D           | 0.66540 |
| LONRF3           | 0.66531 |
| 2810026P18RIK    | 0.66462 |
| RELA             | 0.66457 |
| IGK-V5           | 0.66442 |
| NR2C2AP          | 0.66400 |
| 5830407P18RIK    | 0.66373 |
| 6430527G18RIK    | 0.66331 |
| MLLT3            | 0.66278 |
| LOC624198        | 0.66267 |
| LOC100047788     | 0.66256 |
| JOSD1            | 0.66198 |
| EIF6             | 0.66176 |
| FRMD6            | 0.66124 |
| SESN1            | 0.66051 |
| USP7             | 0.66028 |
| LOC100048508     | 0.65986 |
| IL28RA           | 0.65919 |
| UBE2H            | 0.65661 |
| TOMM34           | 0.65657 |
| SEC61A1          | 0.65562 |
| PKM2             | 0.65499 |
| SERPINA3G        | 0.65435 |
| APBB1            | 0.65371 |
| ADAP1            | 0.65361 |
| ARIH2            | 0.65257 |
| ZFP592           | 0.65172 |
| LOC666025        | 0.65046 |
| LOC100048123     | 0.64937 |
| MFGE8            | 0.64886 |
| EEF2             | 0.64869 |
| FBXO32           | 0.64862 |
| PEX11A           | 0.64839 |
| ZFP710           | 0.64751 |
| IGKV3-2_X16954_1 | 0.64726 |
| 2310047M10RIK    | 0.64709 |
| CRTC3            | 0.64667 |
| RPS13            | 0.64658 |
| RRP1B            | 0.64651 |
| HS6ST1           | 0.64627 |
| NBL1             | 0.64585 |

|               |         |
|---------------|---------|
| CDC37L1       | 0.64556 |
| PTPRE         | 0.64470 |
| PLA1A         | 0.64404 |
| LOC100047651  | 0.64257 |
| LTF           | 0.64131 |
| NRXN2         | 0.64104 |
| HAP1          | 0.63976 |
| TUBA1A        | 0.63903 |
| MAP3K6        | 0.63866 |
| HEXA          | 0.63854 |
| HOXC9         | 0.63783 |
| XPA           | 0.63746 |
| ZFP36         | 0.63745 |
| LOC268569     | 0.63665 |
| EIF3D         | 0.63637 |
| DDX41         | 0.63561 |
| COX7A2L       | 0.63561 |
| DSCR1L2       | 0.63434 |
| BCL2L1        | 0.63347 |
| TIMP1         | 0.63310 |
| LOC100046781  | 0.63244 |
| TMEM159       | 0.63236 |
| E130308A19RIK | 0.63182 |
| SUV420H1      | 0.63107 |
| EG434077      | 0.63079 |
| EEF1B2        | 0.62994 |
| GORASP2       | 0.62908 |
| NDOR1         | 0.62869 |
| LOC100045782  | 0.62833 |
| DTX4          | 0.62821 |
| TRAFD1        | 0.62820 |
| MAPK13        | 0.62792 |
| IAP           | 0.62747 |
| EG545056      | 0.62683 |
| EG666577      | 0.62638 |
| LOC269251     | 0.62633 |
| ANKRD50       | 0.62616 |
| NFIX          | 0.62563 |
| TRIM8         | 0.62534 |
| LOC241621     | 0.62491 |
| INPP5A        | 0.62454 |
| MUC1          | 0.62237 |
| MLLT4         | 0.62220 |



|               |         |
|---------------|---------|
| CPEB2         | 0.62214 |
| DDX24         | 0.62102 |
| D930038J03RIK | 0.62053 |
| FCHSD1        | 0.61990 |
| LOC381774     | 0.61747 |
| EIF1A         | 0.61738 |
| LOC433955     | 0.61707 |
| RNPC2         | 0.61696 |
| BC027231      | 0.61629 |
| LOC100047670  | 0.61623 |
| MEX3A         | 0.61573 |
| SATB1         | 0.61558 |
| LOC433476     | 0.61495 |
| E530004K11RIK | 0.61360 |
| LOC382885     | 0.61329 |
| 1200012P04RIK | 0.61275 |
| SRF           | 0.61248 |
| LOC100046056  | 0.61162 |
| LTBP3         | 0.61140 |
| CASC3         | 0.61115 |
| B230386D16RIK | 0.61100 |
| LOC100045312  | 0.61016 |
| NCOR1         | 0.60983 |
| LOC100048299  | 0.60935 |
| RPS5          | 0.60925 |
| MTF1          | 0.60917 |
| PHC2          | 0.60881 |
| HBEGF         | 0.60808 |
| LOC383077     | 0.60806 |
| MT2           | 0.60693 |
| THY1          | 0.60662 |
| STX3          | 0.60563 |
| ATF3          | 0.60528 |
| CHKB          | 0.60503 |
| NKCC2         | 0.60429 |
| LOC100043919  | 0.60409 |
| PRRC1         | 0.60360 |
| VPS37D        | 0.60356 |
| 2700078K21RIK | 0.60279 |
| DYRK2         | 0.60253 |
| SCNN1A        | 0.60205 |
| AKIRIN1       | 0.60187 |
| 1500001E21RIK | 0.60120 |

|               |         |
|---------------|---------|
| MGEA5         | 0.59991 |
| IHPK1         | 0.59988 |
| NEDD4L        | 0.59968 |
| SERTAD2       | 0.59967 |
| PQLC1         | 0.59898 |
| HOXB2         | 0.59871 |
| ZMIZ1         | 0.59870 |
| TGIF1         | 0.59857 |
| JAK2          | 0.59819 |
| SGMS2         | 0.59797 |
| LOC234987     | 0.59772 |
| 6-Mar         | 0.59721 |
| 1810008A18RIK | 0.59707 |
| H2-AB1        | 0.59690 |
| GBP6          | 0.59633 |
| CSNK1G2       | 0.59632 |
| LRRC59        | 0.59510 |
| TRAF6         | 0.59492 |
| LLGL1         | 0.59485 |
| RHOJ          | 0.59321 |
| TCF25         | 0.59299 |
| H2-Q7         | 0.59260 |
| DBNDD2        | 0.59209 |
| TIRAP         | 0.59129 |
| TUFT1         | 0.59084 |
| HDAC5         | 0.58956 |
| MMP15         | 0.58946 |
| PIK3IP1       | 0.58932 |
| CHAF1B        | 0.58926 |
| PRC1          | 0.58795 |
| RIT1          | 0.58732 |
| 5630401D06RIK | 0.58722 |
| EDC4          | 0.58639 |
| WNT7B         | 0.58569 |
| SLC35B3       | 0.58547 |
| ZFP496        | 0.58539 |
| JAM4          | 0.58479 |
| FOXN3         | 0.58414 |
| HIP1R         | 0.58362 |
| MELA          | 0.58359 |
| HMHA1         | 0.58351 |
| MTAP7D1       | 0.58287 |
| MAPKAPK2      | 0.58239 |

|                  |         |
|------------------|---------|
| RPS16            | 0.58184 |
| LOC384710        | 0.58147 |
| 2700024H10RIK    | 0.58140 |
| IGHA_J00475\$V00 | 0.58128 |
| RCAN3            | 0.58127 |
| LOC626309        | 0.58054 |
| TCIRG1           | 0.58040 |
| THOC3            | 0.58023 |
| FBXL11           | 0.57946 |
| TNRC6B           | 0.57854 |
| PAX8             | 0.57852 |
| WBP4             | 0.57806 |
| DAZAP1           | 0.57731 |
| NACA             | 0.57697 |
| DNAJC5           | 0.57692 |
| SEC14L1          | 0.57596 |
| 100041294        | 0.57506 |
| GBF1             | 0.57358 |
| GNA13            | 0.57356 |
| 2810474O19RIK    | 0.57349 |
| 1700008H02RIK    | 0.57345 |
| LOC383712        | 0.57318 |
| MARK2            | 0.57234 |
| LOC270037        | 0.57107 |
| PLD3             | 0.57097 |
| SERPINA3N        | 0.56992 |
| LOC100048105     | 0.56822 |
| TRIM47           | 0.56819 |
| BCL7C            | 0.56782 |
| ANK              | 0.56766 |
| HP               | 0.56701 |
| RAB31            | 0.56650 |
| LOC667337        | 0.56618 |
| OGFR             | 0.56605 |
| HOXB7            | 0.56569 |
| ZFP637           | 0.56537 |
| LOC383010        | 0.56425 |
| UBG              | 0.56377 |
| MLL1             | 0.56359 |
| CABLES1          | 0.56263 |
| AMY2-2           | 0.56201 |
| PLEKHM2          | 0.56147 |
| 1110007L15RIK    | 0.56144 |

|               |         |
|---------------|---------|
| HSPG2         | 0.56105 |
| D6MIT97       | 0.56104 |
| CLDN5         | 0.56083 |
| VGLL3         | 0.56002 |
| ADARB1        | 0.55996 |
| TNIP2         | 0.55977 |
| MTVR2         | 0.55974 |
| GDPD3         | 0.55955 |
| VARS          | 0.55916 |
| KLHL6         | 0.55905 |
| SMAP2         | 0.55836 |
| PXN           | 0.55800 |
| 1500012F01RIK | 0.55794 |
| PCSK9         | 0.55777 |
| EG630499      | 0.55768 |
| EFNB1         | 0.55748 |
| LOC622655     | 0.55722 |
| IL1B          | 0.55690 |
| AFAP1         | 0.55641 |
| GDPD1         | 0.55557 |
| RNF185        | 0.55545 |
| LITAF         | 0.55535 |
| ZDHHC14       | 0.55507 |
| C1QA          | 0.55502 |
| B930006L02RIK | 0.55501 |
| LOC622994     | 0.55475 |
| SOX5          | 0.55470 |
| ATP6V0A1      | 0.55409 |
| INPP5K        | 0.55382 |
| PRDM2         | 0.55290 |
| 2410001C21RIK | 0.55285 |
| COL12A1       | 0.55261 |
| LOC100044221  | 0.55254 |
| SCAND1        | 0.55218 |
| SPSB1         | 0.55118 |
| MYH9          | 0.55088 |
| KLF4          | 0.55070 |
| ZBTB16        | 0.55062 |
| ANGPTL4       | 0.55060 |
| CDC42BPB      | 0.55025 |
| STK24         | 0.54974 |
| 2610036L11RIK | 0.54953 |
| LOC672474     | 0.54905 |

|               |         |
|---------------|---------|
| RFXAP         | 0.54893 |
| E030034J16RIK | 0.54771 |
| BIN1          | 0.54753 |
| MYD88         | 0.54728 |
| RPS7          | 0.54645 |
| 2310007G05RIK | 0.54608 |
| BC017647      | 0.54585 |
| DUSP1         | 0.54566 |
| BAG3          | 0.54549 |
| PTGDS         | 0.54485 |
| ATG16L1       | 0.54442 |
| CLTA          | 0.54438 |
| DDAH2         | 0.54343 |
| HIST1H1C      | 0.54341 |
| 0610009J05RIK | 0.54336 |
| NR1D1         | 0.54300 |
| CHIC2         | 0.54279 |
| ERGIC3        | 0.54264 |
| BC039210      | 0.54237 |
| HMGA1         | 0.54172 |
| CSRP1         | 0.54129 |
| MGP           | 0.54129 |
| AW228700      | 0.54119 |
| TRP53INP1     | 0.54116 |
| ID3           | 0.54114 |
| BRD4          | 0.54106 |
| ZBTB39        | 0.54099 |
| HN1           | 0.54080 |
| LOC230253     | 0.54063 |
| FOXO3         | 0.54044 |
| MBD1          | 0.53967 |
| 9430080K19RIK | 0.53950 |
| LGALS4        | 0.53929 |
| 5730559C18RIK | 0.53928 |
| RPS15         | 0.53870 |
| TRABD         | 0.53867 |
| LOC547380     | 0.53708 |
| LOC381215     | 0.53618 |
| BTBD6         | 0.53584 |
| TUBB5         | 0.53551 |
| SERPINF1      | 0.53514 |
| LOC100046552  | 0.53472 |
| PDGFA         | 0.53472 |

|               |         |
|---------------|---------|
| BC014795      | 0.53449 |
| RXRB          | 0.53447 |
| FKHL18        | 0.53442 |
| TRPM6         | 0.53441 |
| TBC1D20       | 0.53424 |
| RPL29         | 0.53412 |
| LOC634327     | 0.53394 |
| TMPRSS2       | 0.53390 |
| IGHG          | 0.53381 |
| NCOA5         | 0.53347 |
| CTSK          | 0.53329 |
| MYST2         | 0.53296 |
| LOC636944     | 0.53295 |
| H2AFV         | 0.53252 |
| ZBTB2         | 0.53232 |
| SIAH1A        | 0.53199 |
| 2310005L22RIK | 0.53100 |
| CSDA          | 0.53093 |
| ITPK1         | 0.53077 |
| SCARA3        | 0.53075 |
| LOC100045644  | 0.53075 |
| DAXX          | 0.53038 |
| FAM110B       | 0.53004 |
| 1110008P14RIK | 0.52937 |
| RNF125        | 0.52921 |
| 5430406J06RIK | 0.52829 |
| C030014F05RIK | 0.52786 |
| MCRS1         | 0.52763 |
| IPMK          | 0.52760 |
| SFTPD         | 0.52754 |
| LOC100047427  | 0.52741 |
| PLA2G12B      | 0.52731 |
| WDR43         | 0.52670 |
| NRM           | 0.52663 |
| PER           | 0.52633 |
| MTAP1S        | 0.52577 |
| KLF2          | 0.52523 |
| ACBD6         | 0.52508 |
| 8430427H17RIK | 0.52462 |
| PHKG2         | 0.52454 |
| PDZRN3        | 0.52410 |
| RSC1A1        | 0.52366 |
| FMNL3         | 0.52363 |

|               |         |
|---------------|---------|
| WNK4          | 0.52327 |
| APP           | 0.52311 |
| YPEL3         | 0.52285 |
| 2600005C20RIK | 0.52250 |
| 2310044H10RIK | 0.52199 |
| 2700094K13RIK | 0.52100 |
| TMEM63B       | 0.52073 |
| CDCA3         | 0.52062 |
| LAMA5         | 0.52022 |
| NISCH         | 0.51951 |
| DEFB36        | 0.51929 |
| LMBR1L        | 0.51845 |
| GRASP         | 0.51844 |
| 2610028A01RIK | 0.51802 |
| XBP1          | 0.51760 |
| CAPN2         | 0.51736 |
| 2810454F19RIK | 0.51699 |
| PIP5K1A       | 0.51687 |
| LY6E          | 0.51656 |
| GATAD2B       | 0.51580 |
| UBA1          | 0.51572 |
| 8430408G22RIK | 0.51565 |
| BC004044      | 0.51562 |
| SLC4A4        | 0.51562 |
| BSPRY         | 0.51532 |
| MAPKAPK3      | 0.51514 |
| RTN2          | 0.51496 |
| FN1           | 0.51489 |
| MDM2          | 0.51481 |
| ICAM1         | 0.51466 |
| PARD3B        | 0.51454 |
| PKP4          | 0.51448 |
| MFF           | 0.51426 |
| PHF21B        | 0.51405 |
| IRX2          | 0.51396 |
| KRT17         | 0.51374 |
| EHMT2         | 0.51352 |
| EIF3I         | 0.51339 |
| ITPRIP        | 0.51327 |
| CDCA8         | 0.51264 |
| C630024B01RIK | 0.51241 |
| CHD7          | 0.51235 |
| LOC100043192  | 0.51234 |

|                |         |
|----------------|---------|
| DYNC1H1        | 0.51161 |
| VPS37C         | 0.51160 |
| MOBK1B         | 0.51137 |
| BCAR1          | 0.51096 |
| MAST2          | 0.51087 |
| PDK4           | 0.51040 |
| 4930546H06RIK  | 0.51029 |
| POM121         | 0.50960 |
| MFHAS1         | 0.50940 |
| LOC100044165   | 0.50936 |
| SETD1A         | 0.50935 |
| PDLIM1         | 0.50896 |
| OCIAD2         | 0.50857 |
| 1300014I06RIK  | 0.50719 |
| RPS9           | 0.50692 |
| GSTT2          | 0.50659 |
| ABTB1          | 0.50563 |
| TUBB6          | 0.50559 |
| PIP5K1B        | 0.50502 |
| TSPAN17        | 0.50482 |
| DSCR1          | 0.50472 |
| NFATC4         | 0.50457 |
| JMJD1A         | 0.50444 |
| IRF2BP2        | 0.50425 |
| TULIP1-PENDING | 0.50414 |
| DUSP16         | 0.50376 |
| TNFRSF12A      | 0.50366 |
| TBC1D15        | 0.50351 |
| BRMS1          | 0.50336 |
| LOC100046853   | 0.50327 |
| A130010C12RIK  | 0.50288 |
| SNHG10         | 0.50285 |
| DDIT3          | 0.50268 |
| AL022832       | 0.50238 |
| CSRNP2         | 0.50211 |
| SLC5A3         | 0.50198 |
| FRAT2          | 0.50188 |
| ANKRD56        | 0.50146 |
| AW146242       | 0.50119 |
| LOC665235      | 0.50116 |
| TATDN2         | 0.50059 |
| CLASP1         | 0.50025 |
| WFIKKN1        | 0.50004 |



**Table S2: GeneGo pathway enrichment for genes downregulated by rhPTX-2 in Col4a3<sup>-/-</sup> mice at 9wk**

| Enrichment by Pathway Maps |                                                                                       | Total | pValue    | Min FDR   | DEGs_sym_genelist |           |         | Network Objects from Active Data                                                                                                                                                                    |
|----------------------------|---------------------------------------------------------------------------------------|-------|-----------|-----------|-------------------|-----------|---------|-----------------------------------------------------------------------------------------------------------------------------------------------------------------------------------------------------|
| #                          | Maps                                                                                  |       |           |           | p-value           | FDR       | In Data |                                                                                                                                                                                                     |
| 1                          | Cytoskeleton remodeling_TGF_WNT and cytoskeletal remodeling                           | 111   | 3.253E-08 | 1.293E-05 | 3.253E-08         | 1.293E-05 | 22      | Talin, p130CAS, VEGF-A, Actin cytoskeletal, Cyclin D1, GSK3 beta, Caveolin-1, Collagen IV, p21, Fibronectin, MYLK1, WNT, Actin, p38 MAPK, Axin, MLCK, Frizzled, FOXO3A, Paxillin, c-Jun, TAB1, MDM2 |
| 2                          | Immune response_HSP60 and HSP70/TLR signaling pathway                                 | 54    | 4.662E-08 | 1.293E-05 | 4.662E-08         | 1.293E-05 | 15      | IL-1 beta, I-kB, TIRAP (Mal), AP-1, UBE1, NF-kB, TAB2, CD14, HSP60, ICAM1, MyD88, p38 MAPK, TRAF6, c-Jun, TAB1                                                                                      |
| 3                          | Immune response_MIF in innate immunity response                                       | 40    | 4.667E-08 | 1.293E-05 | 4.667E-08         | 1.293E-05 | 13      | IL-1 beta, I-kB, TAB2, CD14, SITPEC (ECSIT), MyD88, LBP, MEKK1(MAP3K1), C/EBPbeta, p38 MAPK, TRAF6, c-Jun, TAB1                                                                                     |
| 4                          | Transcription_P53 signaling pathway                                                   | 39    | 3.059E-07 | 6.353E-05 | 3.059E-07         | 6.353E-05 | 12      | MKP-7, CBP, VEGF-A, XPA, NF-kB, p21, MEKK1(MAP3K1), HSP27, APEX, MKP-1, MDM2, MMP-2                                                                                                                 |
| 5                          | Immune response_IL-1 signaling pathway                                                | 44    | 1.305E-06 | 2.168E-04 | 1.305E-06         | 2.168E-04 | 12      | IL-1 beta, I-kB, AP-1, TAB2, SITPEC (ECSIT), Endothelin-1, MyD88, MEKK1(MAP3K1), c-Jun/c-Jun, TRAF6, c-Jun, TAB1                                                                                    |
| 6                          | Cell adhesion_Chemokines and adhesion                                                 | 100   | 2.554E-06 | 3.537E-04 | 2.554E-06         | 3.537E-04 | 18      | Talin, p130CAS, VEGF-A, Actin cytoskeletal, GSK3 beta, NF-kB, Caveolin-1, Collagen IV, CD44, SERPINE2, Fibronectin, Actin, Zyxin, Rap1GAP1, CD47, Paxillin, c-Jun, MMP-2                            |
| 7                          | Development_Regulation of epithelial-to-mesenchymal transition (EMT)                  | 64    | 3.105E-06 | 3.686E-04 | 3.105E-06         | 3.686E-04 | 14      | PDGF-A, IL-1 beta, EGF, TGIF, RelA (p65 NF-kB subunit), NOTCH1 receptor, Endothelin-1, Fibronectin, WNT, SRF, Frizzled, ACTB, c-Jun, MMP-2                                                          |
| 8                          | Immune response_Bacterial infections in normal airways                                | 49    | 4.517E-06 | 4.692E-04 | 4.517E-06         | 4.692E-04 | 12      | IL-1 beta, I-kB, TIRAP (Mal), JAK2, IFN-gamma receptor, NF-kB, TAB2, CD14, MyD88, LBP, TRAF6, TAB1                                                                                                  |
| 9                          | Development_Thrombopoietin signaling via JAK-STAT pathway                             | 22    | 7.435E-06 | 6.503E-04 | 7.435E-06         | 6.503E-04 | 8       | STAT3, Bcl-XL, JAK2, Cyclin D1, CISH, p21, SERPINA3 (ACT), SOCS3                                                                                                                                    |
| 10                         | Immune response_IL-18 signaling                                                       | 60    | 7.825E-06 | 6.503E-04 | 7.825E-06         | 6.503E-04 | 13      | IL-1 beta, I-kB, AP-1, NF-kB, TAB2, ICAM1, MyD88, Fibronectin, p38 MAPK, TRAF6, c-Jun, Bcl-XS, TAB1                                                                                                 |
| 11                         | Development_WNT signaling pathway, Part 2                                             | 53    | 1.083E-05 | 8.185E-04 | 1.083E-05         | 8.185E-04 | 12      | Casein kinase I epsilon, CBP, VEGF-A, Cyclin D1, GSK3 beta, CD44, DAB2, WNT, Axin, Frizzled, c-Jun, TAB1                                                                                            |
| 12                         | Immune response_Oncostatin M signaling via JAK-Stat in mouse cells                    | 18    | 1.695E-05 | 1.174E-03 | 1.695E-05         | 1.174E-03 | 7       | STAT3, JAK2, VEGF-A, Cyclin D1, SERPINA3 (ACT), SOCS3, TIMP1                                                                                                                                        |
| 13                         | Signal transduction_PTM in IL-17-induced CIKS-dependent MAPK signaling pathways       | 32    | 2.155E-05 | 1.377E-03 | 2.155E-05         | 1.377E-03 | 9       | AP-1, UBE1, ABIN-2, TAB2, MAP3K3, C/EBPbeta, p38 MAPK, TRAF6, TAB1                                                                                                                                  |
| 14                         | Immune response_TLR2 and TLR4 signaling pathways                                      | 57    | 2.383E-05 | 1.415E-03 | 2.383E-05         | 1.415E-03 | 12      | IL-1 beta, I-kB, TIRAP (Mal), AP-1, NF-kB, TAB2, CD14, MyD88, p38 MAPK, TRAF6, c-Jun, TAB1                                                                                                          |
| 15                         | Development_PEDF signaling                                                            | 49    | 2.753E-05 | 1.525E-03 | 2.753E-05         | 1.525E-03 | 11      | IL-1 beta, Bcl-XL, VEGF-A, PEDF (serpinF1), PEDF-R (PLA2-zeta), RelA (p65 NF-kB subunit), NF-kB, JunB, SOD2, Fra-2, NFKBIA                                                                          |
| 16                         | Development_NOTCH1-mediated pathway for NF-kB activity modulation                     | 34    | 3.677E-05 | 1.794E-03 | 3.677E-05         | 1.794E-03 | 9       | NOTCH1 (NICD), I-kB, N-CoR, NF-kB, NOTCH1 receptor, MEKK1(MAP3K1), NOTCH1 (NEXT), TRAF6, NFKBIA                                                                                                     |
| 17                         | Immune response_Oncostatin M signaling via JAK-Stat in human cells                    | 20    | 3.776E-05 | 1.794E-03 | 3.776E-05         | 1.794E-03 | 7       | STAT3, JAK2, VEGF-A, Cyclin D1, SERPINA3 (ACT), SOCS3, TIMP1                                                                                                                                        |
| 18                         | IGF family signaling in colorectal cancer                                             | 60    | 4.100E-05 | 1.794E-03 | 4.100E-05         | 1.794E-03 | 12      | GSK3 alpha/beta, Bcl-XL, I-kB, VEGF-A, Cyclin D1, GSK3 beta, RelA (p65 NF-kB subunit), NF-kB, IRS-2, IBB, MAT2A, c-Jun                                                                              |
| 19                         | IL-6 signaling in multiple myeloma                                                    | 51    | 4.101E-05 | 1.794E-03 | 4.101E-05         | 1.794E-03 | 11      | STAT3, SPHK1, Cyclin D2, Bcl-XL, JAK2, VEGF-A, Cyclin D1, GSK3 beta, p21, c-Jun, MDM2                                                                                                               |
| 20                         | Signal transduction_AKT signaling                                                     | 43    | 4.614E-05 | 1.917E-03 | 4.614E-05         | 1.917E-03 | 10      | GSK3 alpha/beta, Bcl-XL, I-kB, NF-kB, HSP90, p21, Bim, FOXO3A, Cyclin D, MDM2                                                                                                                       |
| 21                         | Cell adhesion_ECM remodeling                                                          | 52    | 4.966E-05 | 1.965E-03 | 4.966E-05         | 1.965E-03 | 11      | MMP-12, HB-EGF, TIMP3, Collagen IV, CD44, SERPINE2, Fibronectin, MMP-15, TIMP1, MMP-14, MMP-2                                                                                                       |
| 22                         | Cytoskeleton remodeling_Cytoskeleton remodeling                                       | 102   | 5.440E-05 | 2.055E-03 | 5.440E-05         | 2.055E-03 | 16      | Talin, p130CAS, VEGF-A, Actin cytoskeletal, GSK3 beta, Caveolin-1, Collagen IV, p21, Fibronectin, MyHC, MYLK1, p38 MAPK, Zyxin, MLCK, Paxillin, c-Jun                                               |
| 23                         | Immune response_HMGB1/TLR signaling pathway                                           | 36    | 6.023E-05 | 2.176E-03 | 6.023E-05         | 2.176E-03 | 9       | IL-1 beta, I-kB, TIRAP (Mal), UBE1, RelA (p65 NF-kB subunit), TAB2, MyD88, TRAF6, TAB1                                                                                                              |
| 24                         | Immune response_CCL2 signaling                                                        | 54    | 7.173E-05 | 2.415E-03 | 7.173E-05         | 2.415E-03 | 11      | IL-1 beta, VEGF-A, Actin cytoskeletal, AP-1, NF-kB, Claudin-5, Caveolin-1, ICAM1, c-Jun, MMP-14, MMP-2                                                                                              |
| 25                         | Immune response_CD137 signaling in immune cell                                        | 29    | 7.267E-05 | 2.415E-03 | 7.267E-05         | 2.415E-03 | 8       | Cyclin D2, Bcl-XL, NF-kB, MEKK1(MAP3K1), p38 MAPK, Bim, NFKBIA, c-Jun                                                                                                                               |
| 26                         | Signal transduction_PTM in IL-17-induced CIKS-independent signaling pathways          | 46    | 8.545E-05 | 2.731E-03 | 8.545E-05         | 2.731E-03 | 10      | STAT3, JAK2, AP-1, GSK3 beta, MAPKAPK2, NF-kB, C/EBPbeta, p38 MAPK, c-Jun, MKP-1                                                                                                                    |
| 27                         | Development_YAP/TAZ-mediated co-regulation of transcription                           | 56    | 1.017E-04 | 3.099E-03 | 1.017E-04         | 3.099E-03 | 11      | Bcl-XL, ID3, VEGF-A, TAZ, Cyclin D1, Catalase, Endothelin-1, SOD2, KLF5, PUMA, SOX9                                                                                                                 |
| 28                         | Immune response_IL-12 signaling pathway                                               | 23    | 1.044E-04 | 3.099E-03 | 1.044E-04         | 3.099E-03 | 7       | STAT3, JAK2, G6NT, PDLIM2, Perforin, SOCS3, c-Jun                                                                                                                                                   |
| 29                         | Immune response_Role of PKR in stress-induced antiviral cell response                 | 57    | 1.203E-04 | 3.248E-03 | 1.203E-04         | 3.248E-03 | 11      | IL-1 beta, I-kB, TIRAP (Mal), RelA (p65 NF-kB subunit), IFN-gamma receptor, NF-kB, TAB2, MyD88, TRAF6, NFKBIA, c-Jun                                                                                |
| 30                         | IL-1 beta-dependent CFTR expression                                                   | 31    | 1.220E-04 | 3.248E-03 | 1.220E-04         | 3.248E-03 | 8       | IL-1 beta, I-kB, TAB2, SITPEC (ECSIT), MyD88, MEKK1(MAP3K1), TRAF6, TAB1                                                                                                                            |
| 31                         | Immune response_TLR5, TLR7, TLR8 and TLR9 signaling pathways                          | 48    | 1.251E-04 | 3.248E-03 | 1.251E-04         | 3.248E-03 | 10      | IL-1 beta, I-kB, AP-1, NF-kB, TAB2, MyD88, p38 MAPK, TRAF6, c-Jun, TAB1                                                                                                                             |
| 32                         | Cell adhesion_Integrin-mediated cell adhesion and migration                           | 48    | 1.251E-04 | 3.248E-03 | 1.251E-04         | 3.248E-03 | 10      | Talin, p130CAS, Actin cytoskeletal, Collagen IV, Fibronectin, MyHC, MYLK1, Zyxin, MLCK, Paxillin                                                                                                    |
| 33                         | Translation_Non-genomic (rapid) action of Androgen Receptor                           | 40    | 1.457E-04 | 3.670E-03 | 1.457E-04         | 3.670E-03 | 9       | HB-EGF, EGF, GSK3 beta, NF-kB, Caveolin-1, WNT, Frizzled, FOXO3A, MDM2                                                                                                                              |
| 34                         | Signal transduction_NF-kB activation pathways                                         | 51    | 2.129E-04 | 5.054E-03 | 2.129E-04         | 5.054E-03 | 10      | IL-1 beta, I-kB, TIRAP (Mal), RelA (p65 NF-kB subunit), NF-kB, TAB2, MyD88, ZFP91, TRAF6, TAB1                                                                                                      |
| 35                         | Some pathways of EMT in cancer cells                                                  | 51    | 2.129E-04 | 5.054E-03 | 2.129E-04         | 5.054E-03 | 10      | STAT3, PDGF-A, I-kB, JAK2, EGF, GSK3 beta, RelA (p65 NF-kB subunit), Endothelin-1, Axin, TAB1                                                                                                       |
| 36                         | Development_EGFR signaling pathway                                                    | 71    | 2.248E-04 | 5.190E-03 | 2.248E-04         | 5.190E-03 | 12      | STAT3, HB-EGF, I-kB, JAK2, EGF, Amphiregulin, GSK3 beta, NF-kB, p38 MAPK, c-Jun, MKP-1, MMP-2                                                                                                       |
| 37                         | Development_WNT signaling pathway, Part 1, Degradation of beta-catenin in the absence | 19    | 2.648E-04 | 5.947E-03 | 2.648E-04         | 5.947E-03 | 6       | Casein kinase I epsilon, Casein kinase I delta, GSK3 beta, DAB2, SKP1, Axin                                                                                                                         |
| 38                         | Development_Growth hormone signaling via STATs and PLCIP3                             | 35    | 3.039E-04 | 6.646E-03 | 3.039E-04         | 6.646E-03 | 8       | STAT3, p130CAS, JAK2, SOCS2, SOCS3, Paxillin, c-Jun, GHR                                                                                                                                            |
| 39                         | Th17 cells in CF                                                                      | 54    | 3.474E-04 | 7.269E-03 | 3.474E-04         | 7.269E-03 | 10      | STAT3, IL-1 beta, JAK2, NF-kB, CD14, ROR-alpha, ICAM1, MyD88, LBP, p38 MAPK                                                                                                                         |

|    |                                                                                         |    |           |           |           |           |    |                                                                                              |
|----|-----------------------------------------------------------------------------------------|----|-----------|-----------|-----------|-----------|----|----------------------------------------------------------------------------------------------|
| 40 | Cell adhesion Tight junctions                                                           | 36 | 3.735E-04 | 7.269E-03 | 3.735E-04 | 7.269E-03 | 8  | CSDA, WNK4, Claudin-5, Caveolin-1, AF-6, Claudin-3, Actin, Claudin-4                         |
| 41 | Immune response IL-12-induced IFN-gamma production                                      | 36 | 3.735E-04 | 7.269E-03 | 3.735E-04 | 7.269E-03 | 8  | STAT3, I-kB, JAK2, GADD45 gamma, NF-kB, TRAF6, c-Jun, GADD45 beta                            |
| 42 | Immune response TNF-R2 signaling pathways                                               | 45 | 3.762E-04 | 7.269E-03 | 3.762E-04 | 7.269E-03 | 9  | Bcl-XL, I-kB, AP-1, RelA (p65 NF-kB subunit), NF-kB, ZFP91, p38 MAPK, Bim, c-Jun             |
| 43 | Transcription Androgen Receptor nuclear signaling                                       | 45 | 3.762E-04 | 7.269E-03 | 3.762E-04 | 7.269E-03 | 9  | STAT3, EGF, N-CoR, Cyclin D1, GSK3 beta, p21, WNT, Frizzled, MMP-2                           |
| 44 | Immune response CD40 signaling                                                          | 65 | 4.034E-04 | 7.489E-03 | 4.034E-04 | 7.489E-03 | 11 | STAT3, Cyclin D2, Bcl-XL, I-kB, JAK2, NF-kB, ICAM1, MEK1(MAP3K1), p38 MAPK, TRAF6, c-Jun     |
| 45 | Immune response Platelet activating factor/ PTAFR pathway signaling                     | 55 | 4.056E-04 | 7.489E-03 | 4.056E-04 | 7.489E-03 | 10 | STAT3, HB-EGF, IL-1 beta, JAK2, Actin cytoskeletal, MAPKAPK2, NF-kB, p38 MAPK, NFKBIA, NF-AT |
| 46 | Immune response MIF-induced cell adhesion, migration and angiogenesis                   | 46 | 4.469E-04 | 7.888E-03 | 4.469E-04 | 7.888E-03 | 9  | VEGF-A, AP-1, NF-kB, ICAM1, CD44, MEK1(MAP3K1), p38 MAPK, c-Jun, MKP-1                       |
| 47 | Role of red blood cell adhesion to endothelium in vaso-occlusion in Sickle cell disease | 37 | 4.556E-04 | 7.888E-03 | 4.556E-04 | 7.888E-03 | 8  | TIR1, Beta-2 adrenergic receptor, cAMP-GEF1, CD44, Fibronectin, LAMA5, BCAM, CD47            |
| 48 | Cooperative action of IFN-gamma and TNF-alpha on astrocytes in multiple sclerosis       | 37 | 4.556E-04 | 7.888E-03 | 4.556E-04 | 7.888E-03 | 8  | I-kB, JAK2, IFN-gamma receptor, Beta-2 adrenergic receptor, NF-kB, ICAM1, C/EBPbeta, NFKBIA  |
| 49 | Immune response CD28 signaling                                                          | 56 | 4.716E-04 | 7.998E-03 | 4.716E-04 | 7.998E-03 | 10 | Bcl-XL, I-kB, NF-AT3(NFATC4), GSK3 beta, NF-kB, MEK1(MAP3K1), PIP5K1, p38 MAPK, NF-AT, c-Jun |
| 50 | Role of ZNF202 in regulation of expression of genes involved in atherosclerosis         | 21 | 4.852E-04 | 8.065E-03 | 4.852E-04 | 8.065E-03 | 6  | VEGF-A, APOA4, SDP1, Beta-adrenergic receptor, APOC3, HDL proteins                           |

**Table S4: TGF-b-induced epithelial secretome**

Fold change = TGF-b / untreated

Ranked by %increase

Promoter binding sites

| Rank | Secreted factor     | P value | Fold change | c-Jun | AP-1 |
|------|---------------------|---------|-------------|-------|------|
| 1    | Fractalkine         | 0.014   | 4.07        |       |      |
| 2    | Activin A           | 0.005   | 3.37        |       |      |
| 3    | IGFBP-2             | 0.027   | 2.79        |       |      |
| 4    | PDGF-AA             | 0.000   | 2.64        |       |      |
| 5    | IGFBP-3             | 0.011   | 2.58        |       |      |
| 6    | Decorin             | 0.021   | 2.57        |       |      |
| 7    | MMP-10              | 0.018   | 2.33        |       |      |
| 8    | PDGF-BB             | 0.011   | 2.15        |       |      |
| 9    | TGF-beta 2          | 0.021   | 1.69        |       |      |
| 10   | ICAM-3 (CD50)       | 0.030   | 1.68        |       |      |
| 11   | Thrombospondin-1    | 0.047   | 1.64        |       |      |
| 12   | IL-17               | 0.019   | 1.56        |       |      |
| 13   | Follistatin-like 1  | 0.045   | 1.54        |       |      |
| 14   | sFRP-4              | 0.038   | 1.47        |       |      |
| 15   | HB-EGF              | 0.013   | 1.47        |       |      |
| 16   | TROY / TNFRSF19     | 0.020   | 1.44        |       |      |
| 17   | Inhibin A           | 0.003   | 1.44        |       |      |
| 18   | LBP                 | 0.006   | 1.43        |       |      |
| 19   | Angiogenin          | 0.021   | 1.43        |       |      |
| 20   | TWEAK R / TNFRSF12  | 0.002   | 1.43        |       |      |
| 21   | Growth Hormone (GH) | 0.046   | 1.36        |       |      |
| 22   | EGF R / ErbB1       | 0.040   | 1.36        |       |      |
| 23   | EDA-A2              | 0.037   | 1.35        |       |      |
| 24   | IL-9                | 0.043   | 1.32        |       |      |
| 25   | Siglec-9            | 0.047   | 1.31        |       |      |
| 26   | NT-4                | 0.017   | 1.30        |       |      |
| 27   | Progranulin         | 0.016   | 1.30        |       |      |
| 28   | MCP-2               | 0.006   | 1.29        |       |      |
| 29   | PDGF-AB             | 0.004   | 1.29        |       |      |
| 30   | IP-10               | 0.036   | 1.28        |       |      |
| 31   | IL-1 sRI            | 0.046   | 1.26        |       |      |
| 32   | IL-17RD             | 0.023   | 1.26        |       |      |
| 33   | Insulin R           | 0.003   | 1.26        |       |      |
| 34   | uPAR                | 0.010   | 1.26        |       |      |
| 35   | HGFR                | 0.015   | 1.25        |       |      |
| 36   | M-CSF R             | 0.035   | 1.25        |       |      |
| 37   | HCR / CRAM-A/B      | 0.020   | 1.24        |       |      |
| 38   | NT-3                | 0.007   | 1.24        |       |      |

|    |                    |       |      |  |  |
|----|--------------------|-------|------|--|--|
| 39 | TNF-alpha          | 0.017 | 1.23 |  |  |
| 40 | GREMLIN            | 0.005 | 1.22 |  |  |
| 41 | TMEFF2             | 0.014 | 1.22 |  |  |
| 42 | IL-15              | 0.007 | 1.22 |  |  |
| 43 | Leptin (OB)        | 0.026 | 1.22 |  |  |
| 44 | IL-13              | 0.000 | 1.21 |  |  |
| 45 | IL-10              | 0.012 | 1.21 |  |  |
| 46 | ErbB3              | 0.030 | 1.20 |  |  |
| 47 | IL-1 R8            | 0.035 | 1.20 |  |  |
| 48 | VEGF-D             | 0.037 | 1.19 |  |  |
| 49 | PIGF               | 0.047 | 1.18 |  |  |
| 50 | TCCR / WSX-1       | 0.035 | 1.18 |  |  |
| 51 | TNF RII / TNFRSF1B | 0.009 | 1.17 |  |  |
| 52 | MMP-8              | 0.035 | 1.16 |  |  |
| 53 | IL-18 BPa          | 0.035 | 1.15 |  |  |
| 54 | CNTF               | 0.033 | 1.14 |  |  |
| 55 | Vasorin            | 0.045 | 1.14 |  |  |
| 56 | IL-7               | 0.007 | 1.14 |  |  |
| 57 | NCAM-1 / CD56      | 0.009 | 1.12 |  |  |
| 58 | BCMA / TNFRSF17    | 0.035 | 0.49 |  |  |
| 59 | BMP-8              | 0.005 | 0.40 |  |  |

## Table S5: rhPTX-2 regulation of epithelial secretome

Fold change = PTX-2 + TGF-b / TGF-b

Ranked by %inhibition by rhPTX-2

| Rank | Secreted factor     | P value | Fold change | Promoter binding sites |      |
|------|---------------------|---------|-------------|------------------------|------|
|      |                     |         |             | c-Jun                  | AP-1 |
| 1    | MDC                 | 0.048   | 0.465       |                        |      |
| 2    | Fractalkine         | 0.041   | 0.491       |                        |      |
| 3    | TGF-beta RI / ALK-5 | 0.031   | 0.728       |                        |      |
| 4    | TGF-beta 2          | 0.032   | 0.731       |                        |      |
| 5    | NT-4                | 0.007   | 0.803       |                        |      |
| 6    | IL-17RD             | 0.014   | 0.806       |                        |      |
| 7    | LBP                 | 0.035   | 0.810       |                        |      |
| 8    | VEGF-D              | 0.029   | 0.815       |                        |      |
| 9    | NT-3                | 0.007   | 0.819       |                        |      |
| 10   | M-CSF R             | 0.041   | 0.826       |                        |      |
| 11   | TNF RI / TNFRSF1A   | 0.052   | 0.846       |                        |      |
| 12   | MMP-8               | 0.001   | 0.849       |                        |      |
| 13   | IL-1 sRI            | 0.023   | 0.856       |                        |      |
| 14   | MMP-3               | 0.024   | 0.864       |                        |      |
| 15   | OSM                 | 0.018   | 0.874       |                        |      |
| 16   | IL-18 BPa           | 0.043   | 0.897       |                        |      |
| 17   | TIMP-3              | 0.033   | 1.511       |                        |      |

**Table S6: Quantitative RT-PCR primer sequences**

| <b>Gene</b>   | <b>Forward</b>            | <b>Reverse</b>              |
|---------------|---------------------------|-----------------------------|
| <i>Acta2</i>  | CTGACAGAGGCACCACTGAA      | CATCTCCAGAGTCCAGCACA        |
| <i>Arg1</i>   | GAATGGAAGAGTCAGTGTGGT     | AGTGTTGATGTCAGTGTGAGC       |
| <i>Ccr2</i>   | GAGCCATACCTGTAAATGCCA     | ACTGAGGTAACATATTATTGTCTTCCA |
| <i>CD206</i>  | TATCTCTGTCATCCCTGTCTCT    | CAAGTTGCCGTCTGAACTGA        |
| <i>CD86</i>   | CAGACTCCTGTAGACGTGTTC     | AACAGCATCTGAGATCAGCA        |
| <i>Col1a1</i> | CTGGTGAACAGGGTGTTCCT      | AGAACCA TCAGCACCTTTGG       |
| <i>Csf1</i>   | CAGCAGTTGATCGACAGTCA      | TCTTTAGGTAGCAAACAGGATCA     |
| <i>Cx3cr1</i> | TCCCTTCCCATCTGCTCA        | CACAATGTCGCCCAAATAACAG      |
| <i>Fcgr1</i>  | TGGCTTCTAACAACCTCTGCTAC   | GCCCCTCACACCATAAAGTG        |
| <i>Fcrls</i>  | CAGTGTCTCAAAGCAGAGTCA     | TCCCCTTCAACGACCAGT          |
| <i>Gapdh</i>  | GAGTCAACGGATTTGGTCGT      | TTGATTTTGGAGGGATCTCG        |
| <i>Igf1</i>   | ATGCTCTTCAGTTCGTGTGT      | AGTACATCTCCAGTCTCCTCAG      |
| <i>Igf2r</i>  | GGAAGGCCAGGAACTGTC        | AGTGTAAGAGAGCTGTATGTGTC     |
| <i>Il10</i>   | TCAGCCAGGTGAAGACTTTTC     | GGCATCACTTCTACCAGGTAA       |
| <i>Il23a</i>  | ACCAGCGGGACATATGAATC      | GATCCTTTGCAAGCAGAACTG       |
| <i>Il4ra</i>  | CTGACCTGGAATAACCTGTACC    | GATGTTGATCGGGAAGCTCA        |
| <i>IL6</i>    | GGTGACAACCACGGCCTTCCC     | AAGCCTCCGACTTGTGAAGTGGT     |
| <i>iNOS</i>   | AGCCTTGCATCCTCATTGGGCCTGG | ATGCGGCCTCCTTTGAGCCCTTTG    |
| <i>Silec1</i> | ACGTCCAGCCTAGACTTCTATG    | CAGGAGAAGCGAGTGTGAG         |
| <i>Slamf1</i> | CAGCATCAAGACAGCATCTACA    | CCCCCAGTGGTACAAGAGTA        |
| <i>Tnfa</i>   | CGCTCTTCTGTCTACTGAACTT    | GATGAGAGGGAGGCCATT          |
| <i>Trem1</i>  | CTGTGCGTGTTCCTTTGTCTC     | ATGTGGACTTCACTGGGTCT        |
| <i>Wnt7b</i>  | GACTTTTCTCGTCGCTTTGTG     | CACTTACATTCCAGCTTCATGC      |
